# Supplementary material
Source: publisher figshare collection journal article supplement (https://gsajournals.figshare.com/ndownloader/files/13991171)
Supplement: Supplementary file 1 [file 13991171]

## Sheet: TableS10
Table S10 Annotation of heterozygosity SNP s detected in M. baccata genome.
SNP Effect	Count	Genes number	Percentage(%)
intergenic	3073164	-	81.7435
intron	356264	21003	9.47631
CDS	234269	28004	6.23135
5' UTR	45803	7638	1.21832
3' UTR	48131	7628	1.28024
